# Supplementary material for: Best Practices for Systematic Case Review in Collaborative Care
Source: Atypon-hosted journal article supplement (doi:10.1176/appi.ps.201900085), 2019-08-27
Supplement: appi.ps.201900085.ds001.pdf [file appi.ps.201900085.ds001.pdf]

 


Psychiatry Online
